# Supplementary material for: A High-Throughput Screening of a Natural Products Library for Mitochondria Modulators
Source: MDPI journal article supplement (doi:10.3390/biom14040440), 2024-04-04
Supplement: s1 [file s1]

## Supplementary Material

# A High-Throughput Screening of a Natural Products Library for Mitochondria Modulators

Emmanuel Makinde <sup>1</sup>, Linlin Ma <sup>1,2</sup>, George D. Mellick <sup>1,2</sup> and Yunjiang Feng <sup>1,2,\*</sup>

<sup>1</sup> Griffith Institute for Drug Discovery, Griffith University, Brisbane, QLD 4111, Australia

<sup>2</sup> School of Environment and Science, Griffith University, Brisbane QLD 4111, Australia

\* Correspondence: y.feng@griffith.edu.au

### Table of contents.

|                                                                                                                   |    |
|-------------------------------------------------------------------------------------------------------------------|----|
| <b>Figure S1.</b> HPLC Chromatogram of <i>Ternstroemia sp.</i> .....                                              | 2  |
| <b>Figure S2.</b> HPLC Chromatogram of <i>Alnus sp.</i> .....                                                     | 2  |
| <b>Figure S3.</b> HPLC Chromatogram of <i>Balanops sp.</i> .....                                                  | 2  |
| <b>Figure S4.</b> HPLC Chromatogram of <i>Anredera sp.</i> .....                                                  | 2  |
| <b>Figure S5.</b> HPLC Chromatogram of <i>Cestrum sp.</i> .....                                                   | 3  |
| <b>Figure S6.</b> HPLC Chromatogram of <i>Ilex sp.</i> .....                                                      | 3  |
| <b>Figure S7.</b> HPLC Chromatogram of <i>Dendrilla sp.</i> .....                                                 | 3  |
| <b>Figure S8.</b> HPLC Chromatogram of <i>Balanophora sp.</i> .....                                               | 3  |
| <b>Figure S9.</b> HPLC Chromatogram of <i>Aptos sp.</i> .....                                                     | 4  |
| <b>Figure S10.</b> HPLC Chromatogram of <i>Rhaphoxya sp.</i> .....                                                | 4  |
| <b>Figure S11.</b> HPLC Chromatogram of <i>Fucraea sp.</i> .....                                                  | 4  |
| <b>Figure S12.</b> MTT assay of fractions at 100, 50 and 25 µg/ml .....                                           | 5  |
| <b>Figure S12 (contd.).</b> MTT assay of fractions at 100, 50 and 25 µg/ml continued .....                        | 6  |
| <b>Figure S13.</b> Base peak ion chromatogram and full mass spectra of <i>Ternstroemia sp.</i> , fraction 4 ..... | 7  |
| <b>Figure S14.</b> Base peak ion chromatogram and full mass spectra of <i>Alnus sp.</i> , fraction 4 .....        | 8  |
| <b>Figure S15.</b> Base peak ion chromatogram and full mass spectra of <i>Anredera sp.</i> , fraction 1 .....     | 9  |
| <b>Figure S16.</b> Base peak ion chromatogram and full mass spectra of <i>Cestrum sp.</i> , fraction 1. ....      | 10 |
| <b>Figure S17.</b> Base peak ion chromatogram and full mass spectra of <i>Dendrilla sp.</i> , fraction 3. ....    | 11 |
| <b>Figure S18.</b> Base peak ion chromatogram and full mass spectra of <i>Balanophora sp.</i> , fraction 2 .....  | 12 |
| <b>Figure S19.</b> Base peak ion chromatogram and full mass spectra of <i>Aptos sp.</i> , fraction 6 .....        | 13 |
| <b>Figure S20.</b> Base peak ion chromatogram and full mass spectra of <i>Rhaphoxya sp.</i> , fraction 6 .....    | 14 |

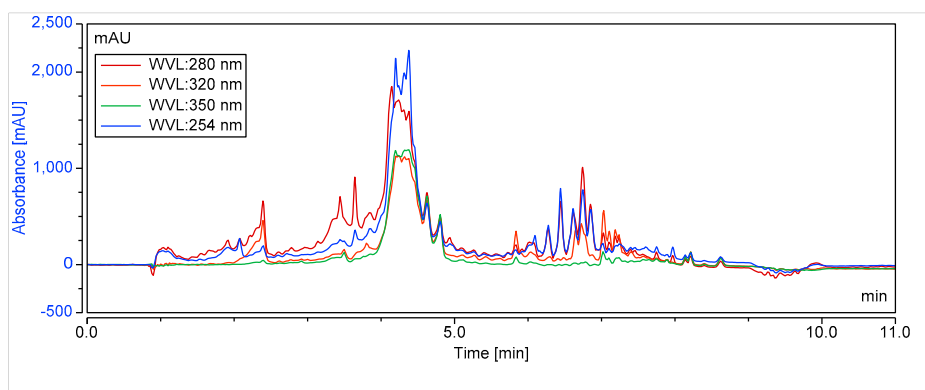

**Figure S1.** HPLC Chromatogram of *Ternstroemia* sp.

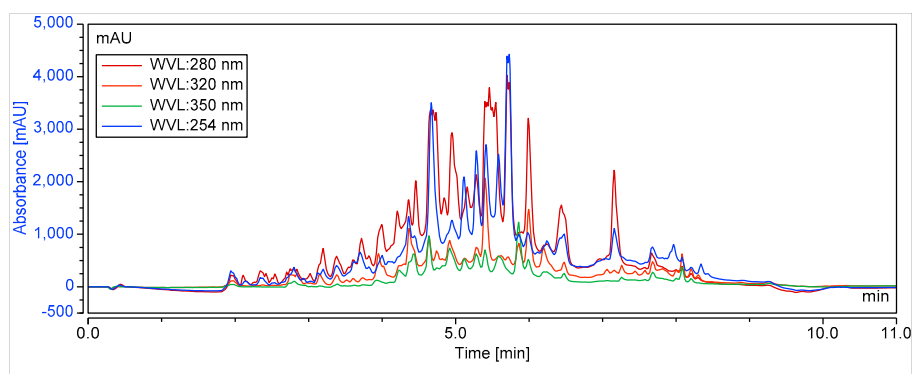

**Figure S2.** HPLC Chromatogram of *Alnus* sp.

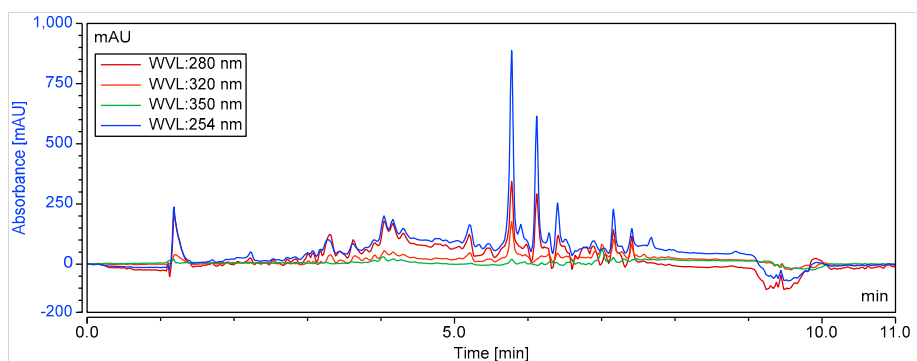

**Figure S3.** HPLC Chromatogram of *Balanops* sp.

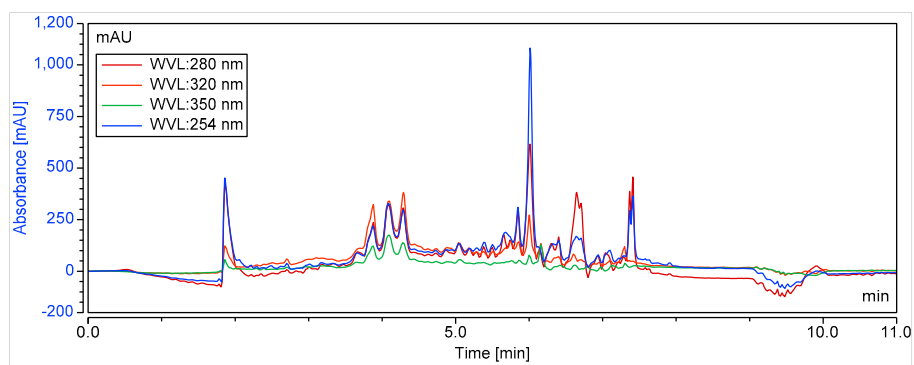

**Figure S4.** HPLC Chromatogram of *Anredera* sp.

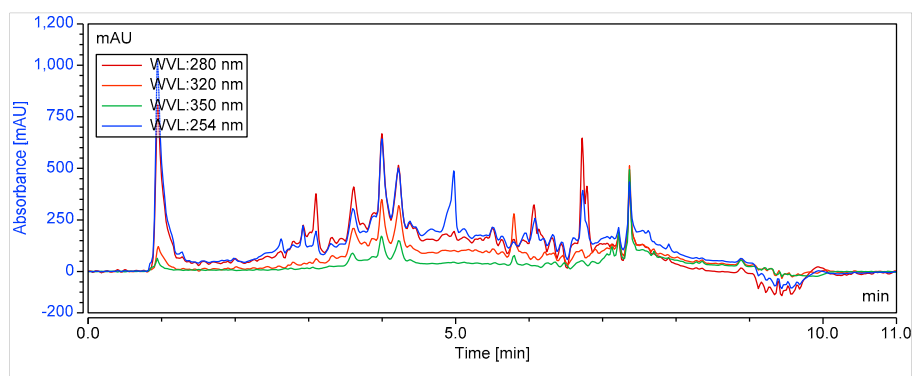

**Figure S5.** HPLC Chromatogram of *Cestrum sp.*

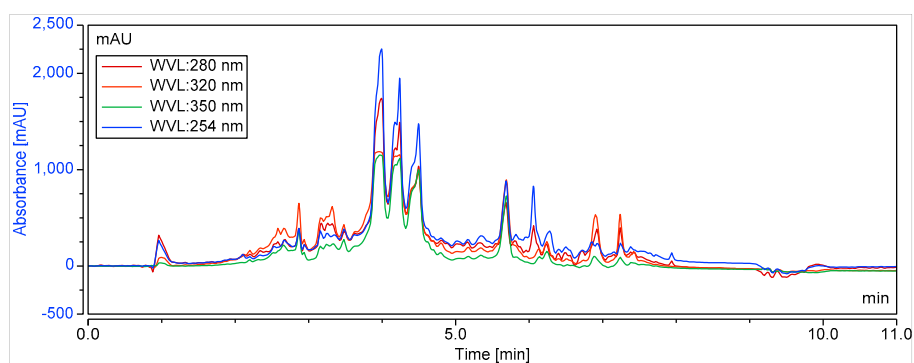

**Figure S6.** HPLC Chromatogram of *Ilex sp.*

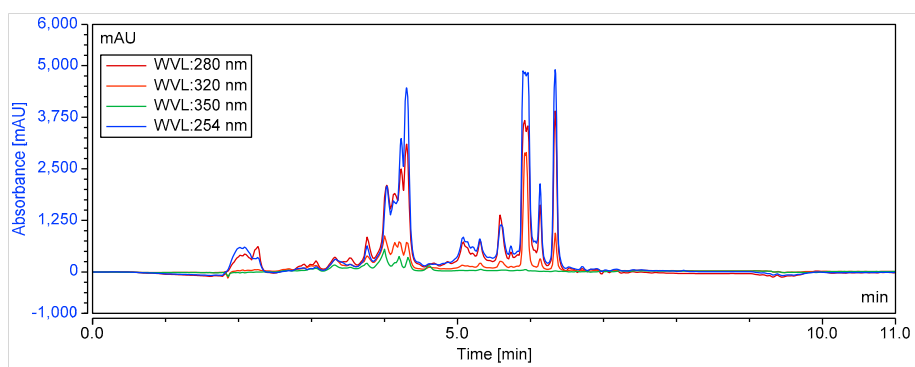

**Figure S7.** HPLC Chromatogram of *Dendrilla sp.*

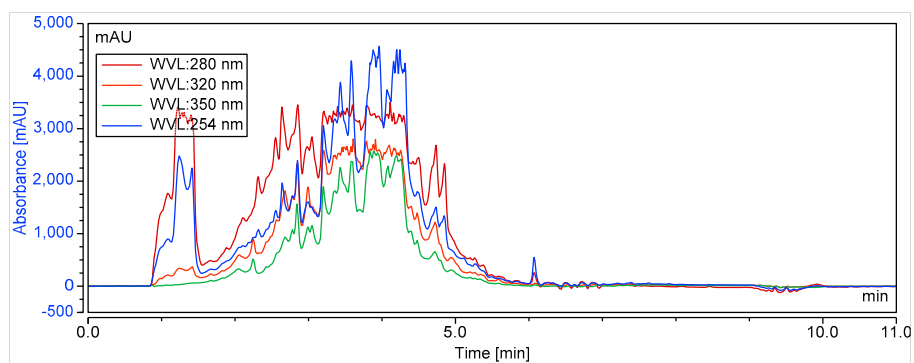

**Figure S8.** HPLC Chromatogram of *Balanophora sp.*

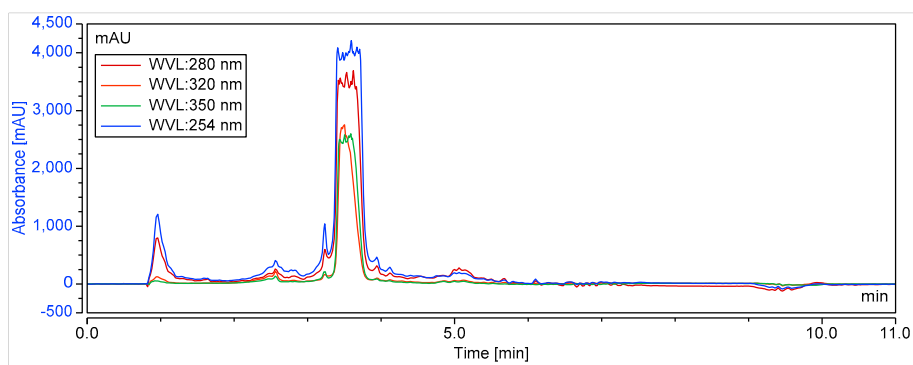

**Figure S9.** HPLC Chromatogram of *Aptos sp.*

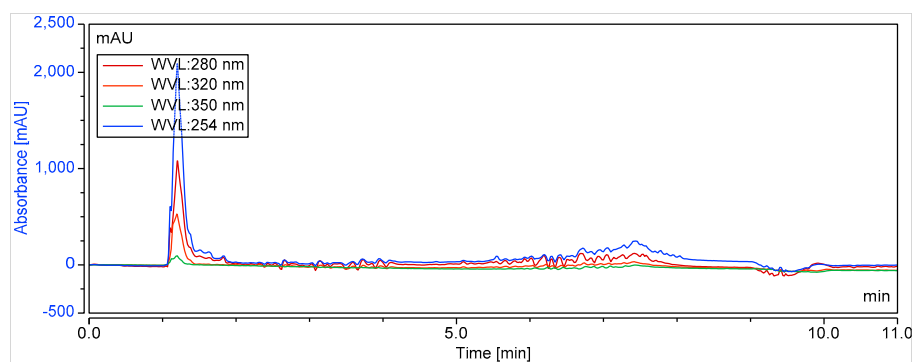

**Figure S10.** HPLC Chromatogram of *Rhaphoxya sp.*

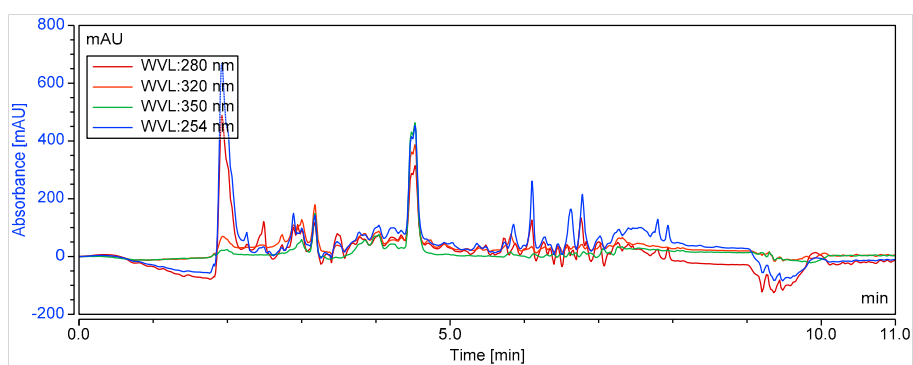

**Figure S11.** HPLC Chromatogram of *Fucraea sp.*

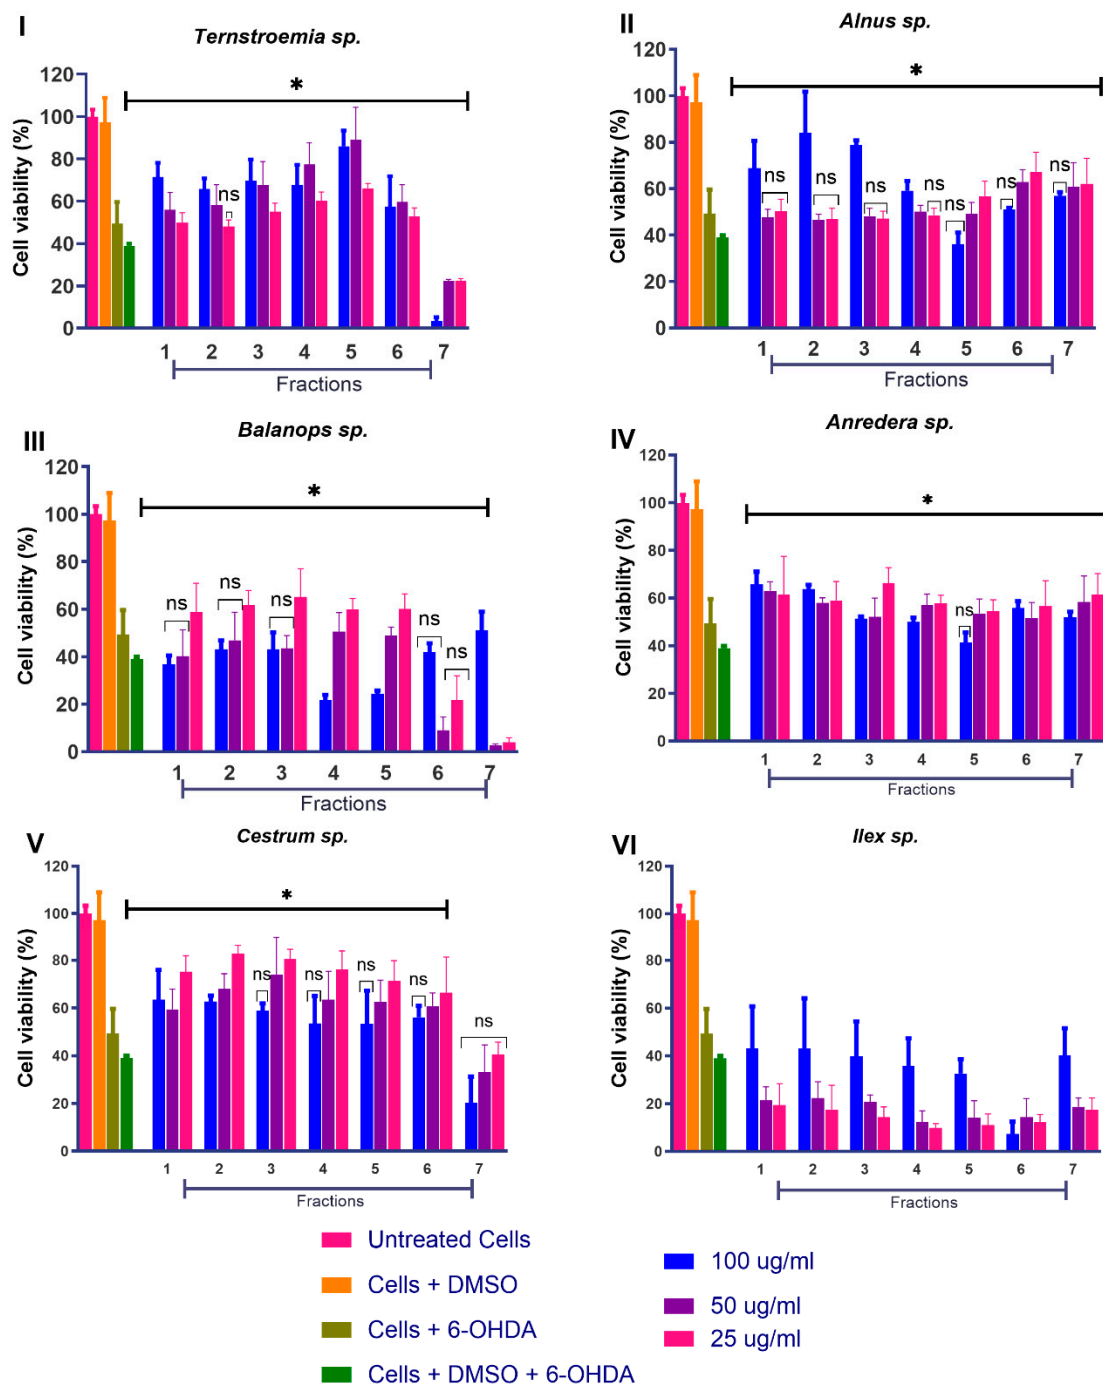

**Figure S12.** MTT assay of fractions at 100, 50 and 25 µg/ml

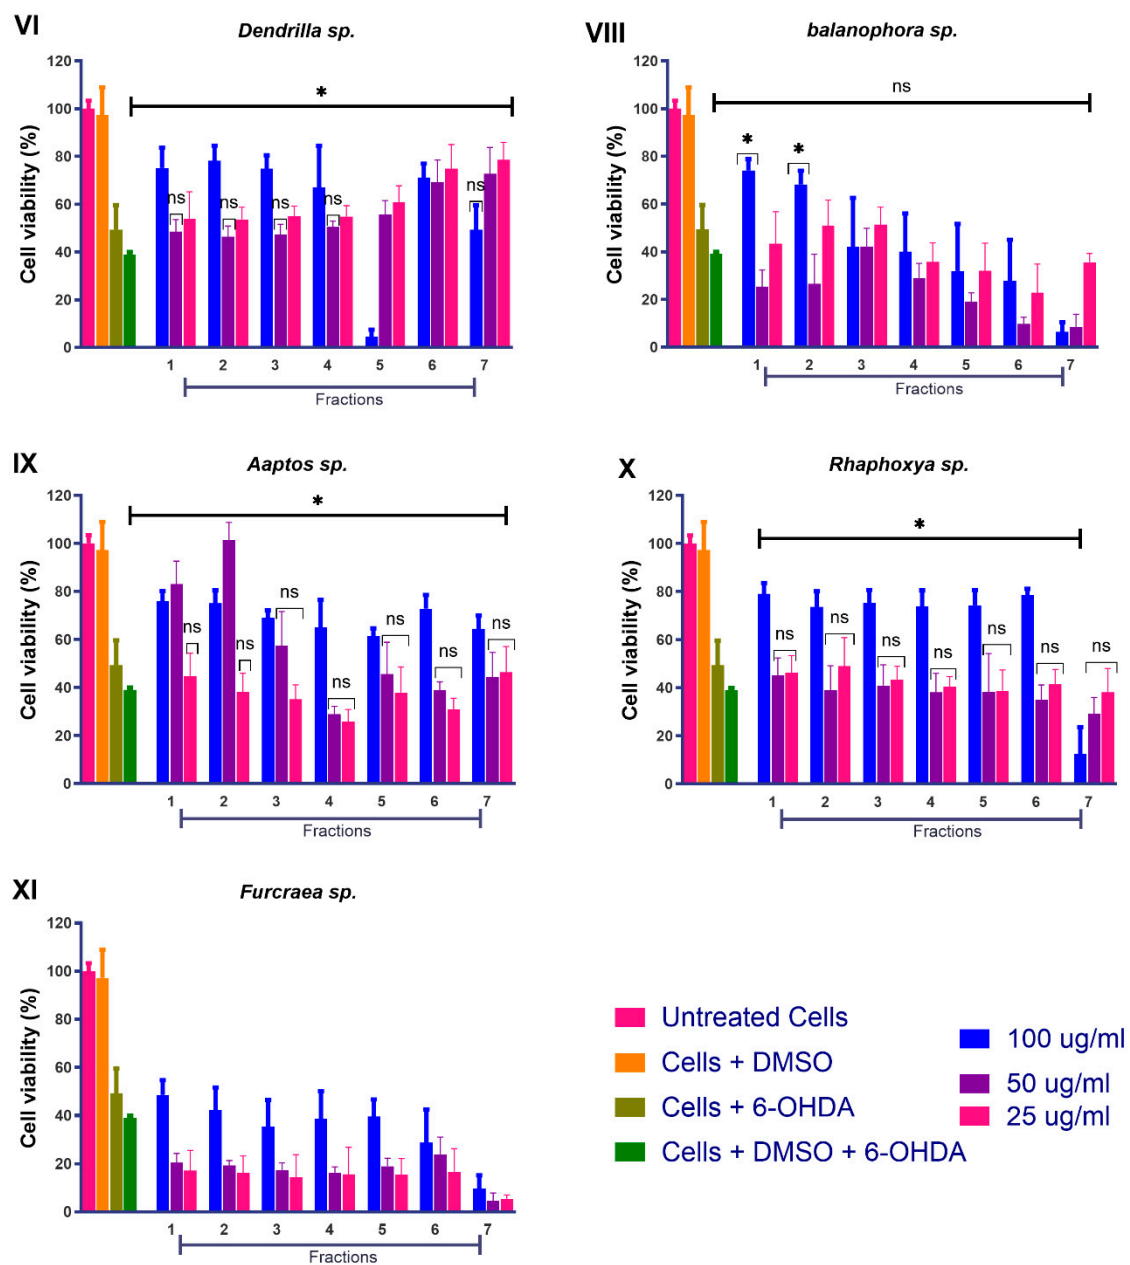

**Figure S12 (contd).** MTT assay of fractions at 100, 50 and 25  $\mu\text{g/ml}$ .

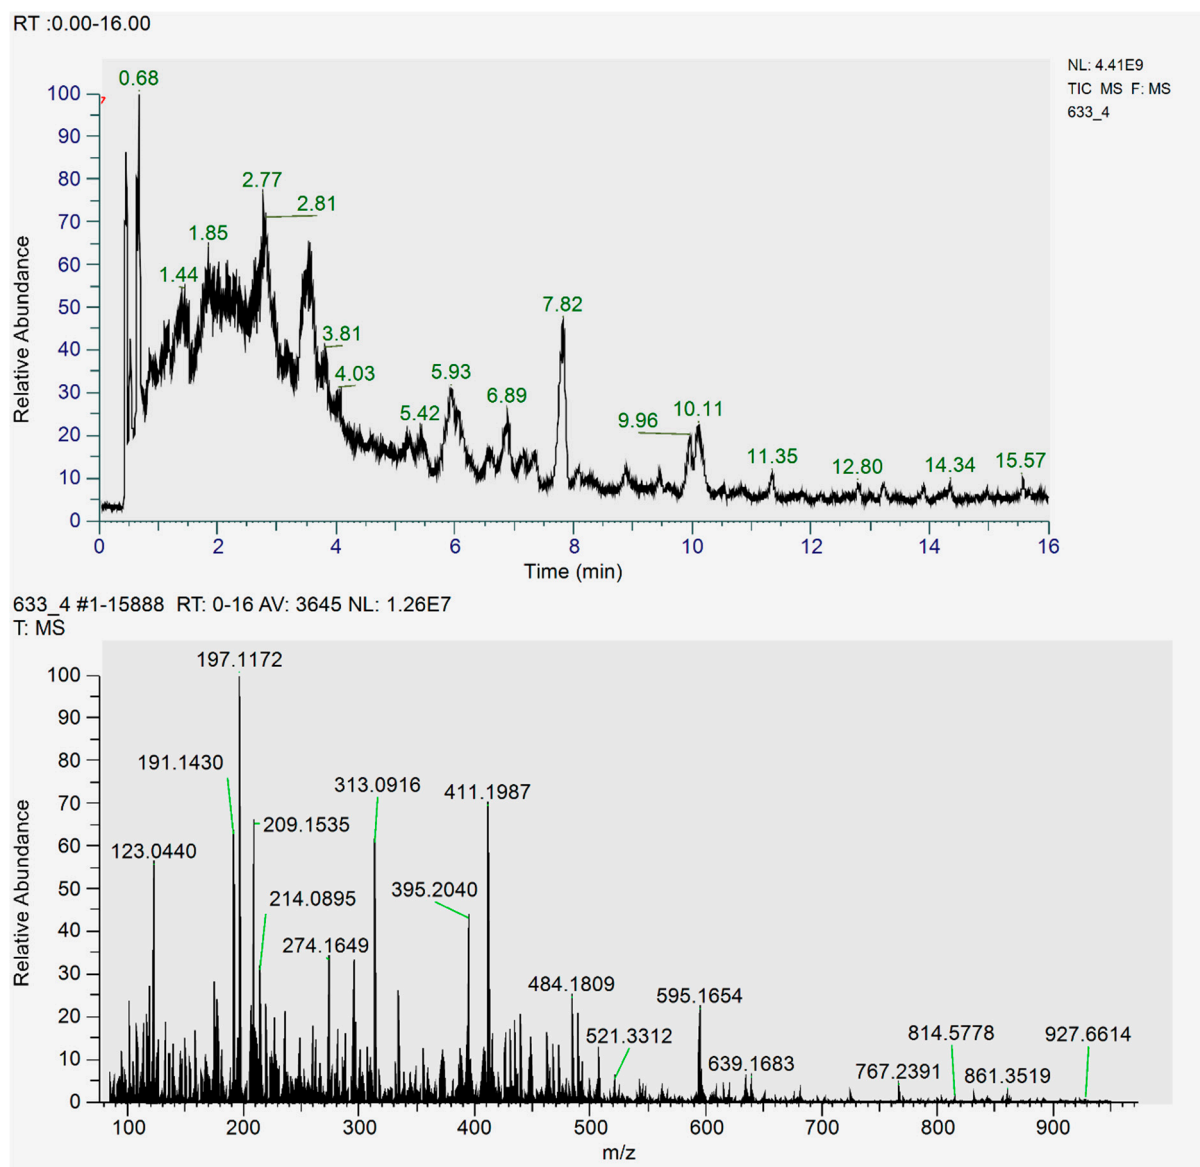

**Figure S13.** Base peak ion chromatogram and full mass spectra of *Ternstroemia* sp., fraction 4.

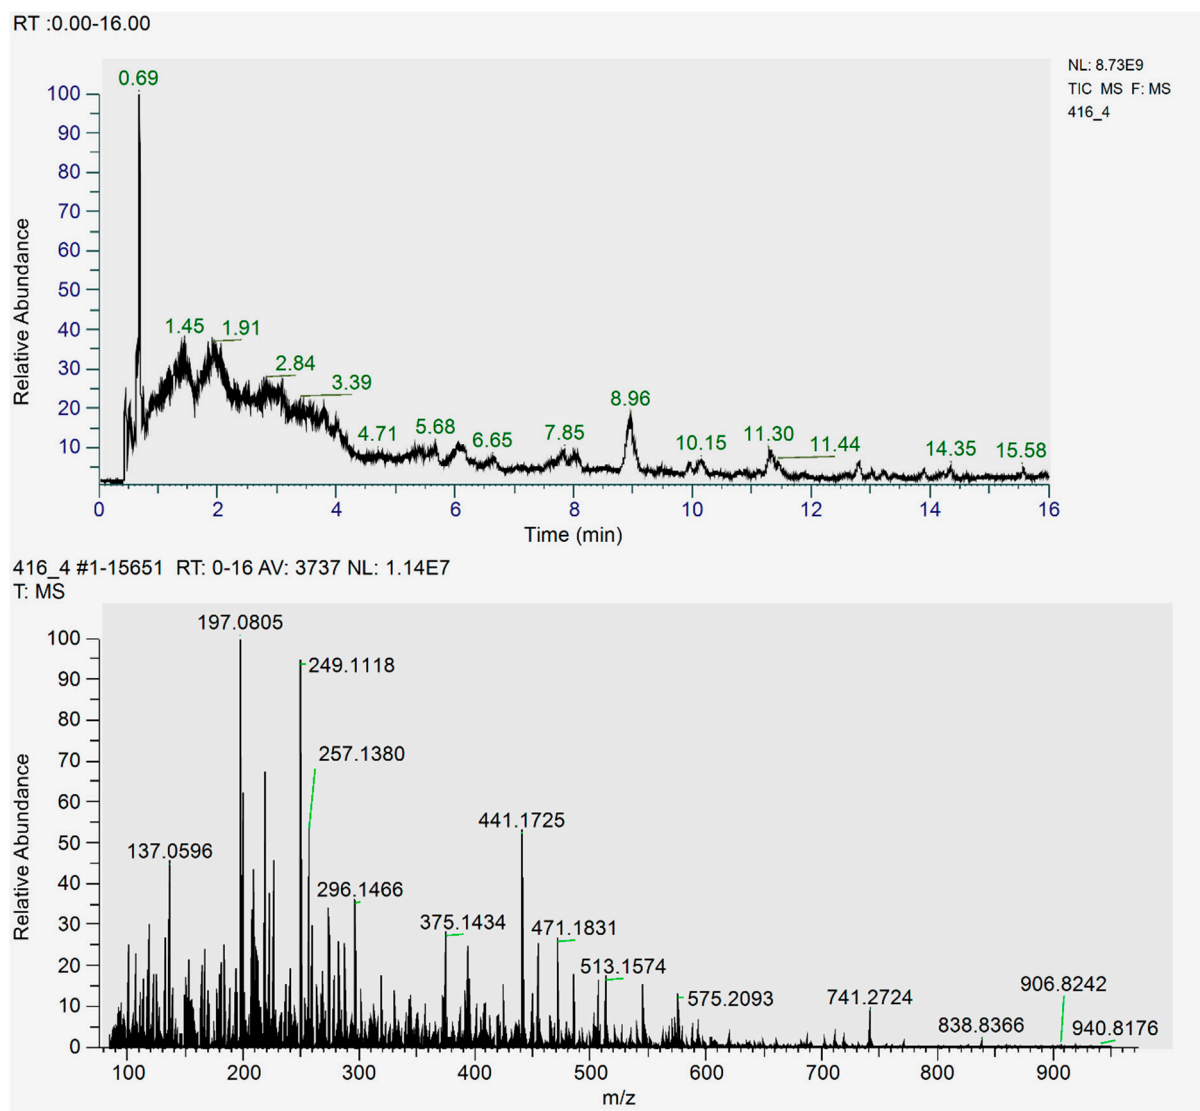

**Figure S14.** Base peak ion chromatogram and full mass spectra of *Alnus sp.*, fraction 4.



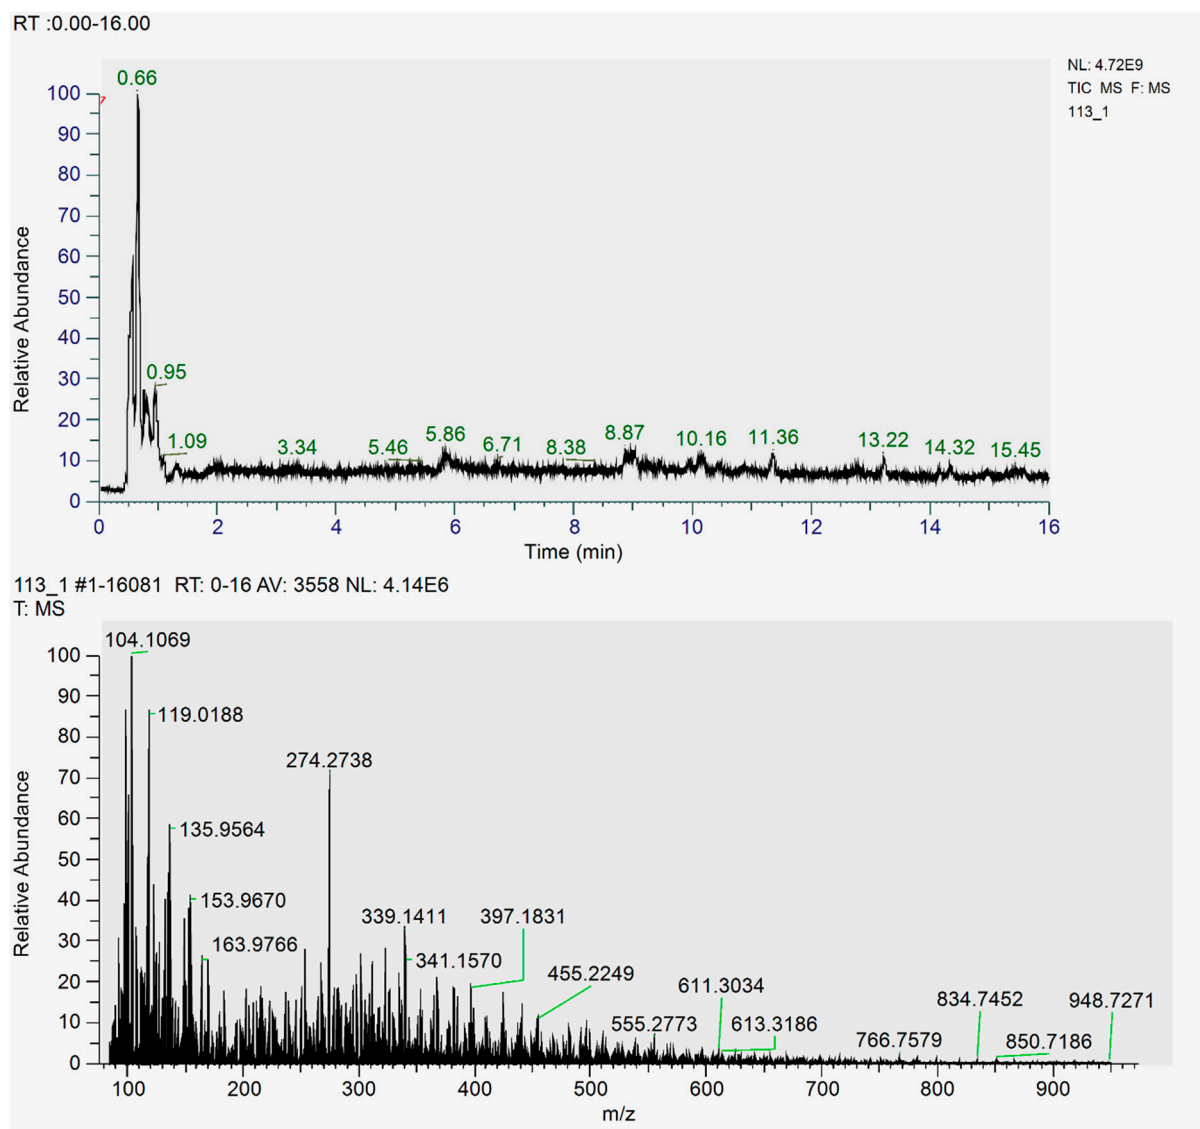

**Figure S15.** Base peak ion chromatogram and full mass spectra of *Anredera sp.*, fraction 1.

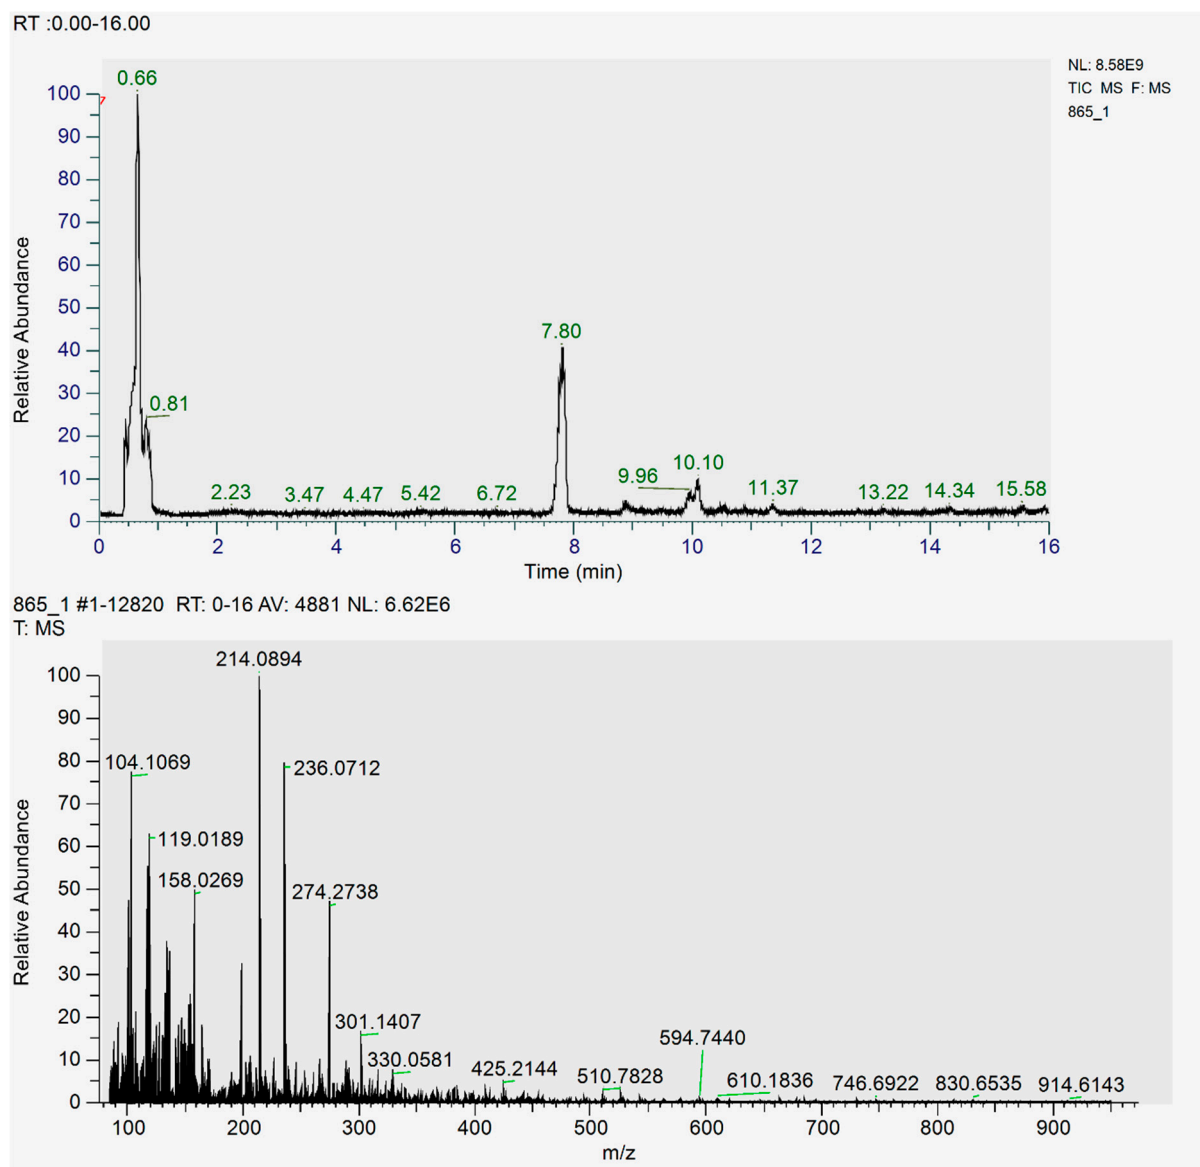

**Figure S16.** Base peak ion chromatogram and full mass spectra of *Cestrum sp.*, fraction 1.

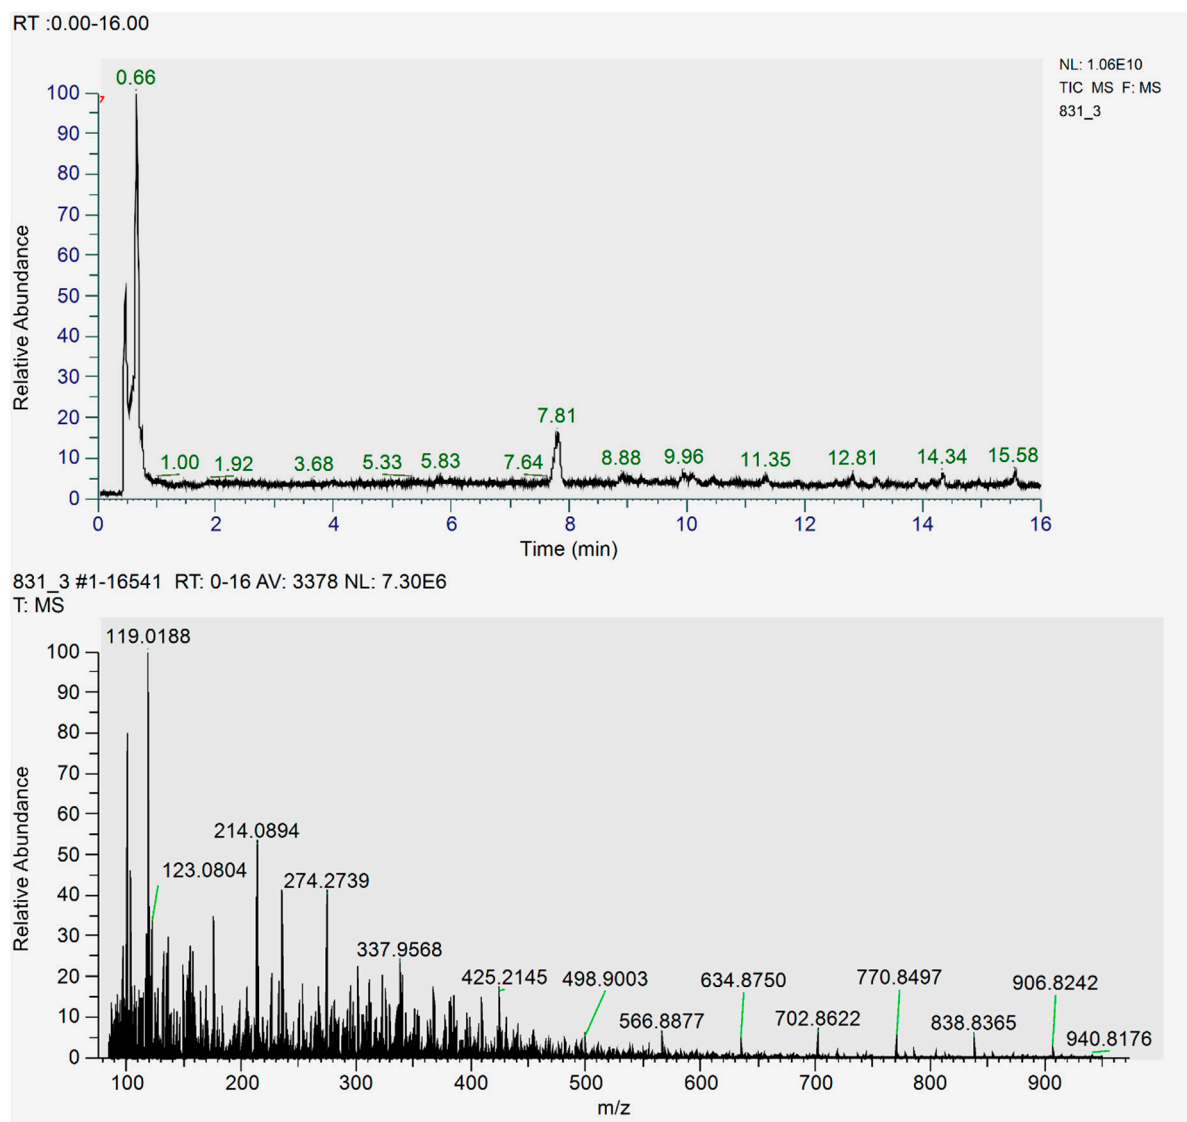

**Figure S17.** Base peak ion chromatogram and full mass spectra of *Dendrilla sp.*, fraction 3.

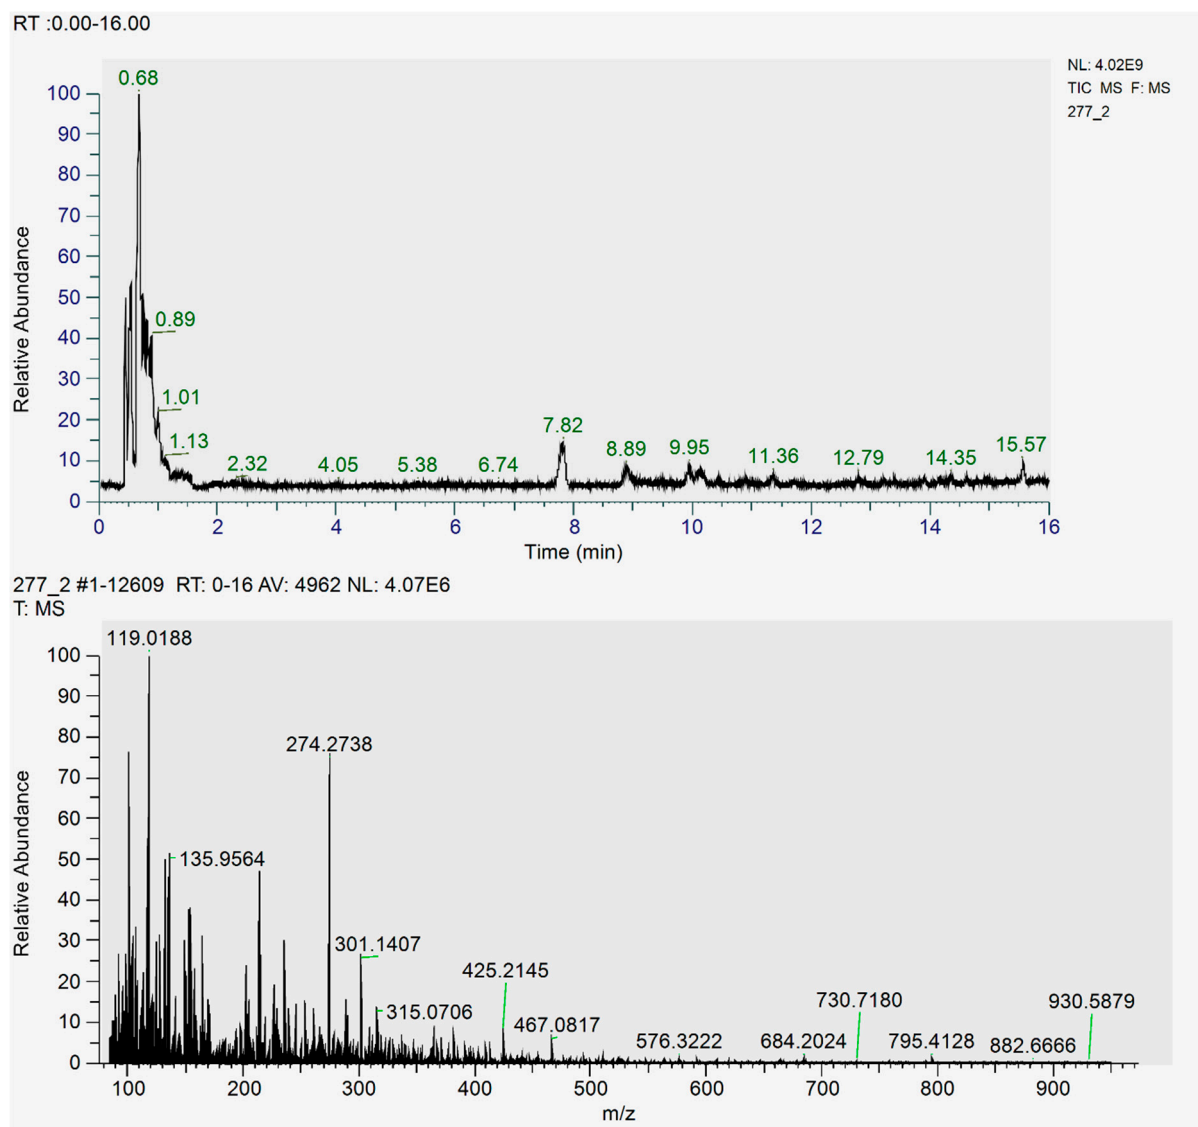

**Figure S18.** Base peak ion chromatogram and full mass spectra of *Balanophora* sp., fraction 2.

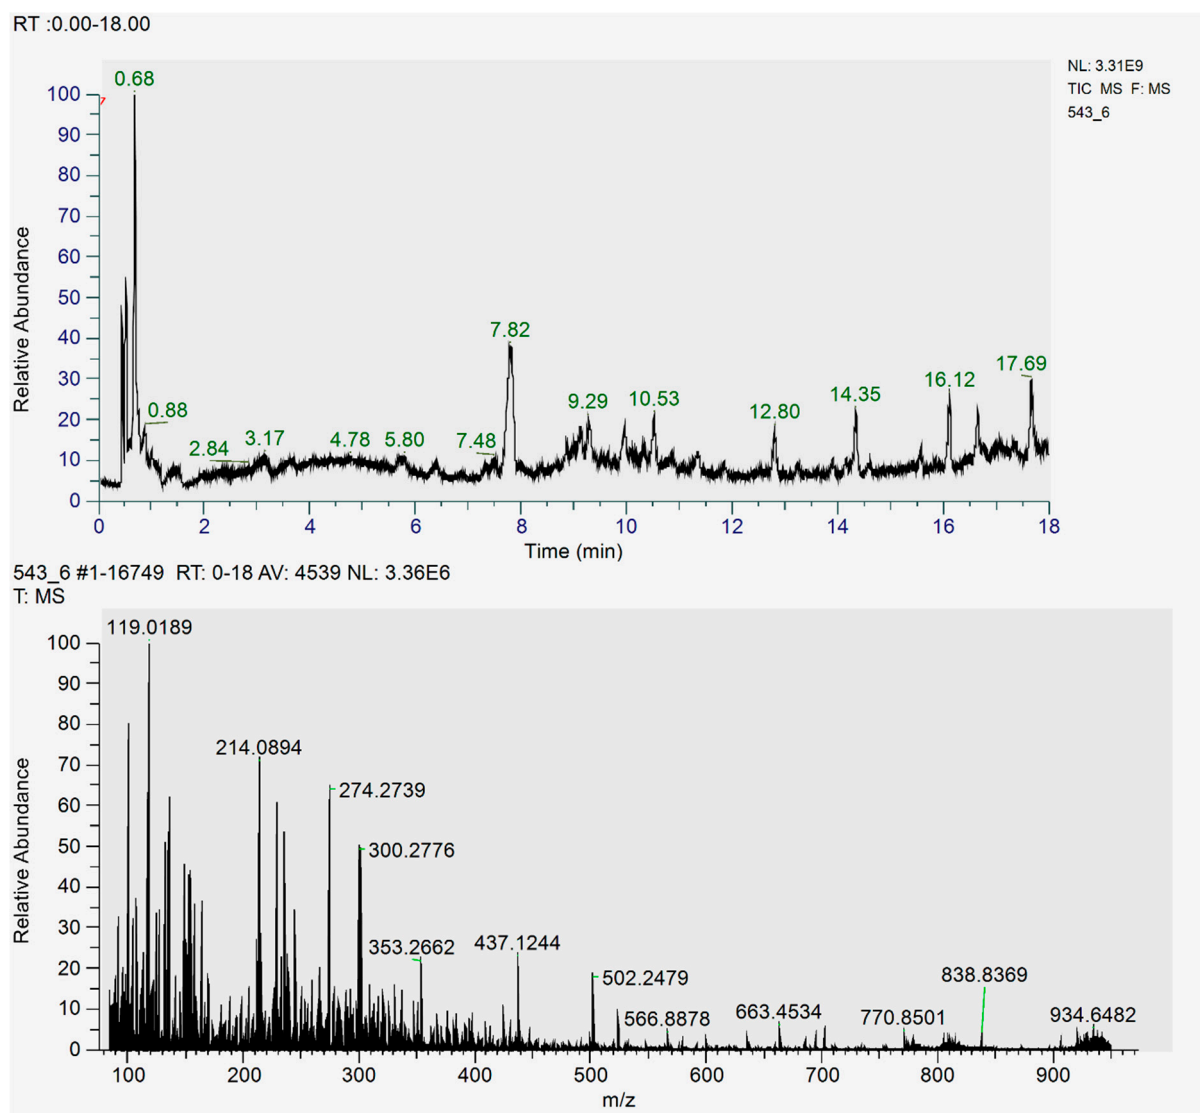

**Figure S19.** Base peak ion chromatogram and full mass spectra of *Aptos sp.*, fraction 6.

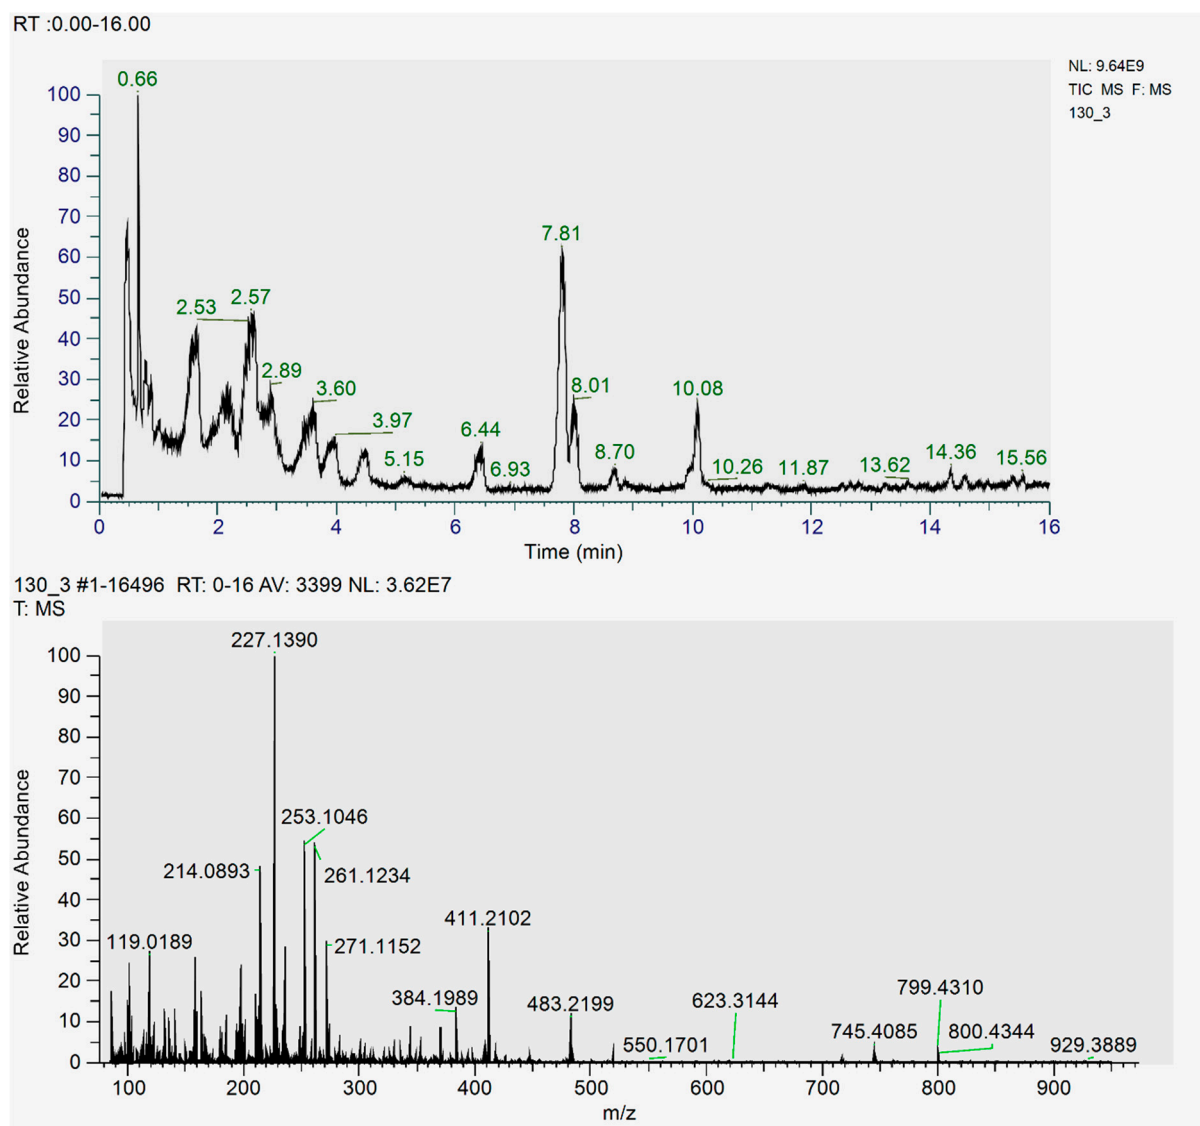

**Figure S20.** Base peak ion chromatogram and full mass spectra of *Rhaphoxya sp.*, fraction 6.
